# Supplementary material for: The Genetic Structure of the Swedish Population
Source: PubMed Central journal article supplement (PMC3150368; doi:10.1371/journal.pone.0022547), 2011-08-04

# Finnish ancestry cutoff

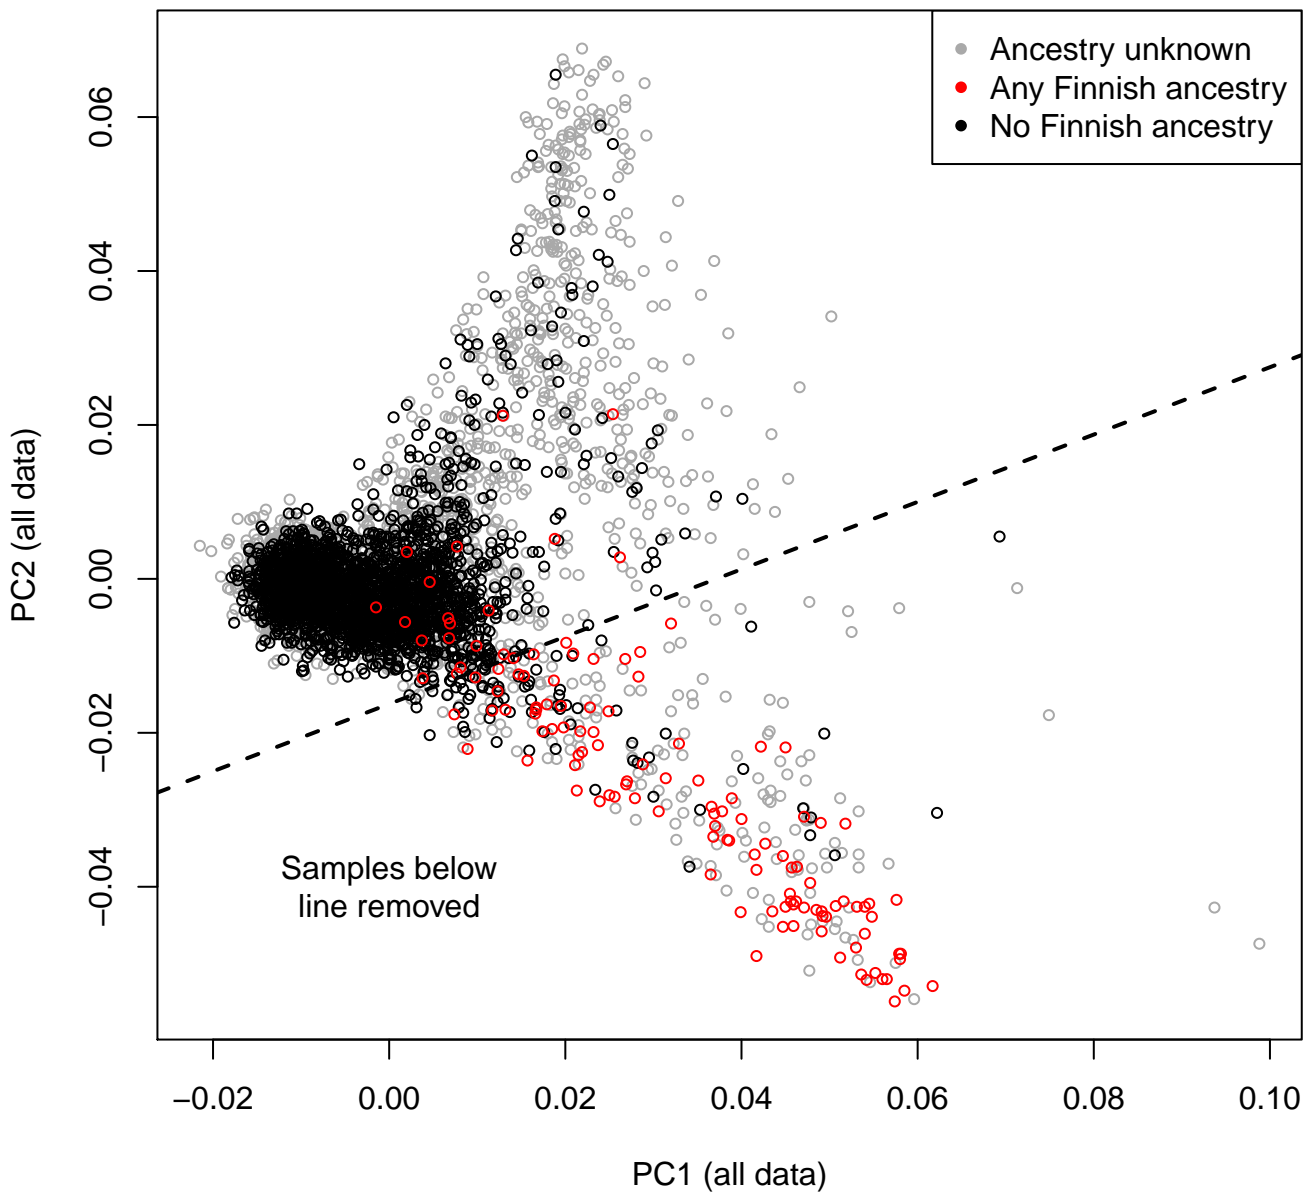

Supplement: pone.0022547.s001.pdf [file pone.0022547.s001.pdf]
