# Supplementary material for: The Genetic Structure of the Swedish Population
Source: PubMed Central journal article supplement (PMC3150368; doi:10.1371/journal.pone.0022547), 2011-08-04

# Histogram of PC2 in 76 Finns

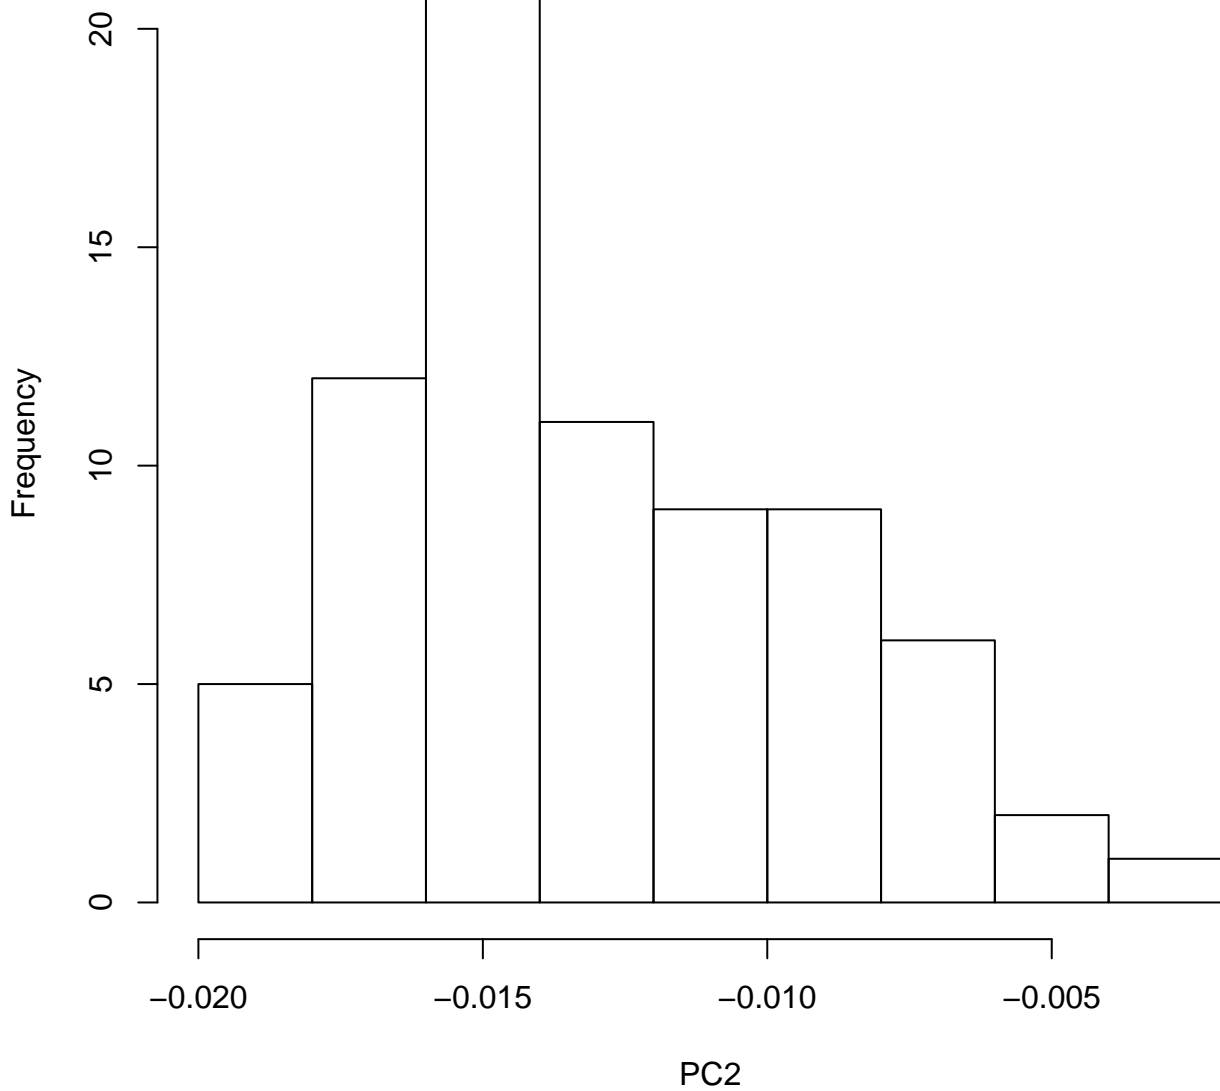

Supplement: pone.0022547.s004.pdf [file pone.0022547.s004.pdf]
