# Supplementary material for: The Genetic Structure of the Swedish Population
Source: PubMed Central journal article supplement (PMC3150368; doi:10.1371/journal.pone.0022547), 2011-08-04

# Effect of lambda on power

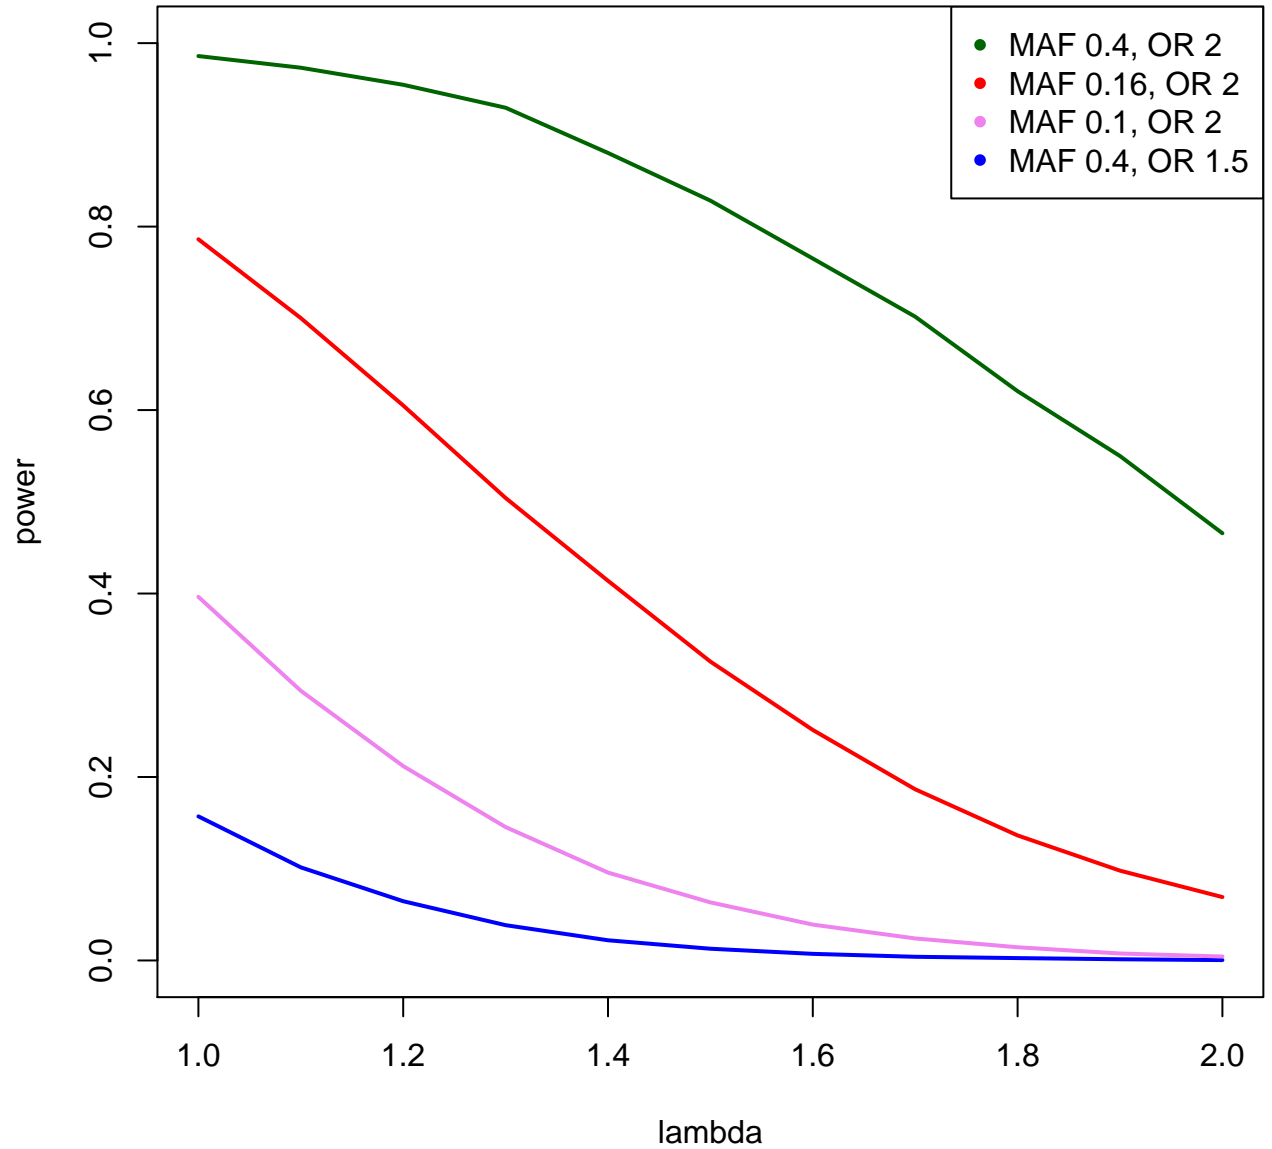

Supplement: pone.0022547.s009.pdf [file pone.0022547.s009.pdf]
